# Supplementary material for: Photo-directed growth of Au nanowires on ZnO arrays for enhancing photoelectrochemical performances
Source: Royal Society of Chemistry journal article supplement (doi:10.1039/c4ta02960g), 2014-01-01
Supplement: c4ta02960g1.pdf [file c4ta02960g1.pdf]

**Supporting Information for**

**Photo-directed growth of Au nanowires on ZnO arrays for  
enhancing photoelectrochemical performances**

Teng Wang,<sup>a</sup> Bingjun Jin,<sup>a</sup> Zhengbo Jiao,<sup>a</sup> Gongxuan Lu,<sup>a</sup> Jinhua Ye,<sup>b</sup> and Yingpu Bi<sup>\*a</sup>

<sup>a</sup>. *State Key Laboratory for Oxo Synthesis & Selective Oxidation, and National Engineering Research Center for Fine Petrochemical Intermediates, Lanzhou Institute of Chemical Physics, CAS, Lanzhou 730000, China.*

*E-mail: [yingpubi@licp.cas.cn](mailto:yingpubi@licp.cas.cn)*

<sup>b</sup>. *International Center for Materials Nanoarchitectonics (MANA), and Research Unit for Environmental Remediation Materials, National Institute for Materials Science, Tsukuba, 305-0047, Japan.*

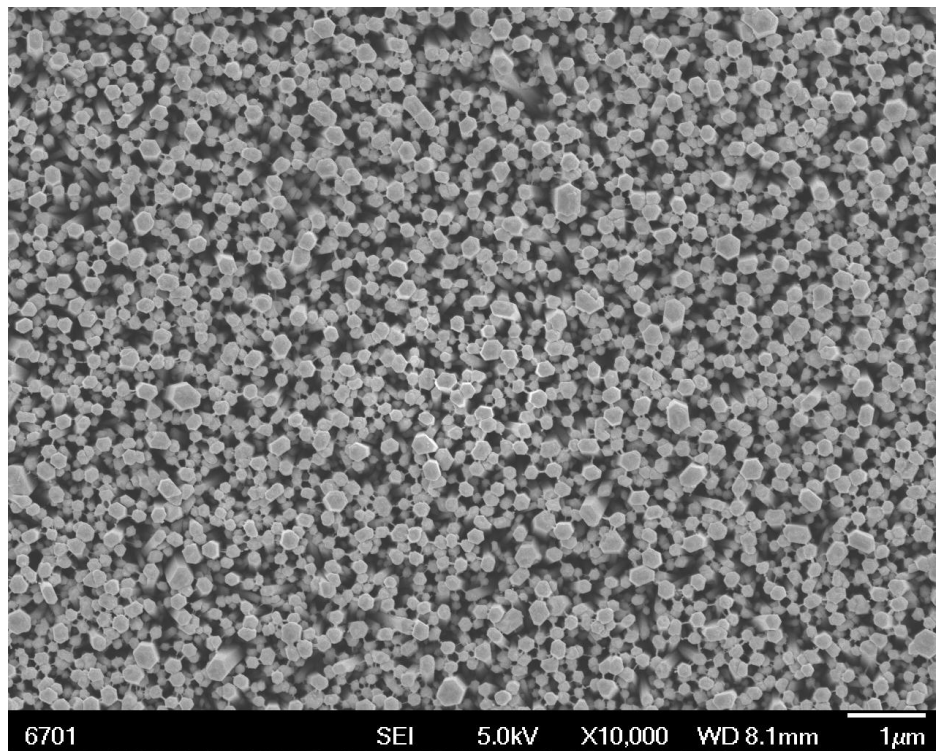

**Figure S1** Top-view SEM image of cross-linked Au/ZnO nanowire arrays

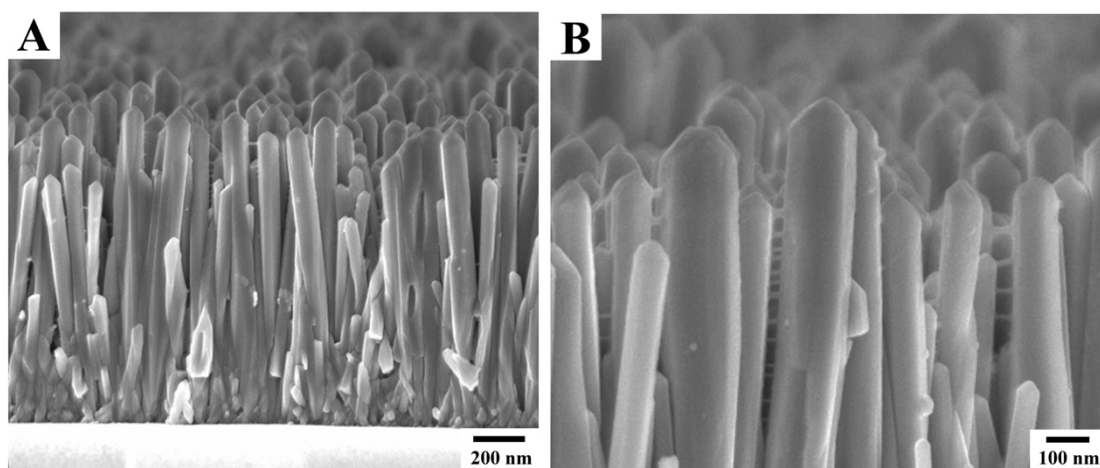

**Figure S2** (A,B) cross-sectional SEM image of cross-linked Au/ZnO nanowire array.

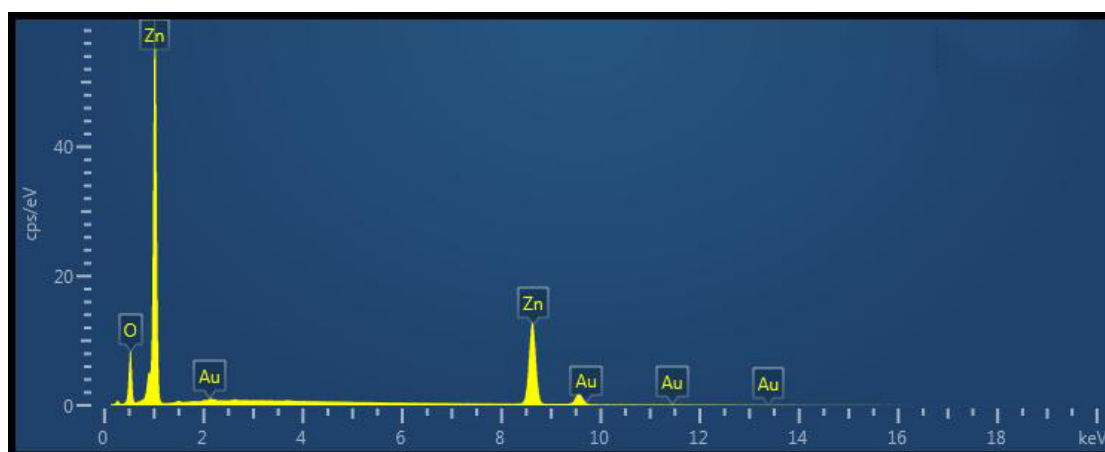

**Figure S3** EDS of the Au/ZnO heterostructures

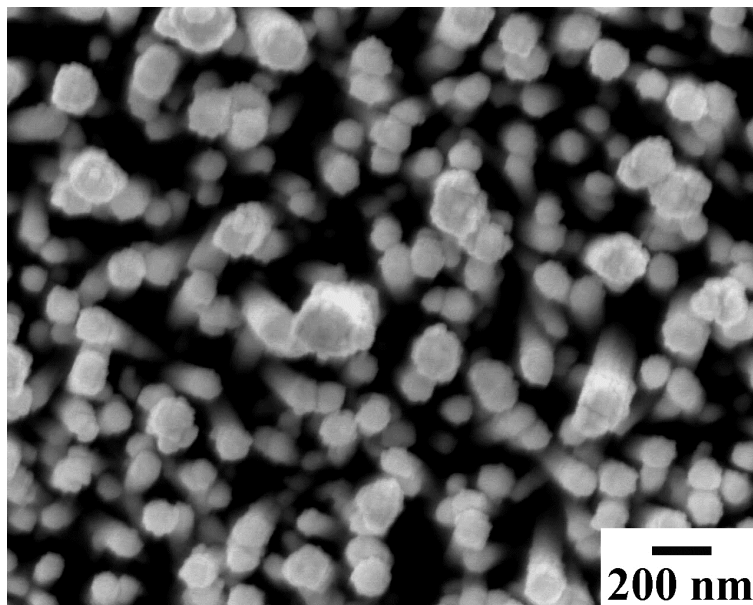

**Figure S4** SEM image of Au/ZnO nanowire arrays reacted in 0.4 mM HAuCl<sub>4</sub>, 0.1 M Na<sub>3</sub>PO<sub>4</sub> and 0.05 M PVP aqueous solution.

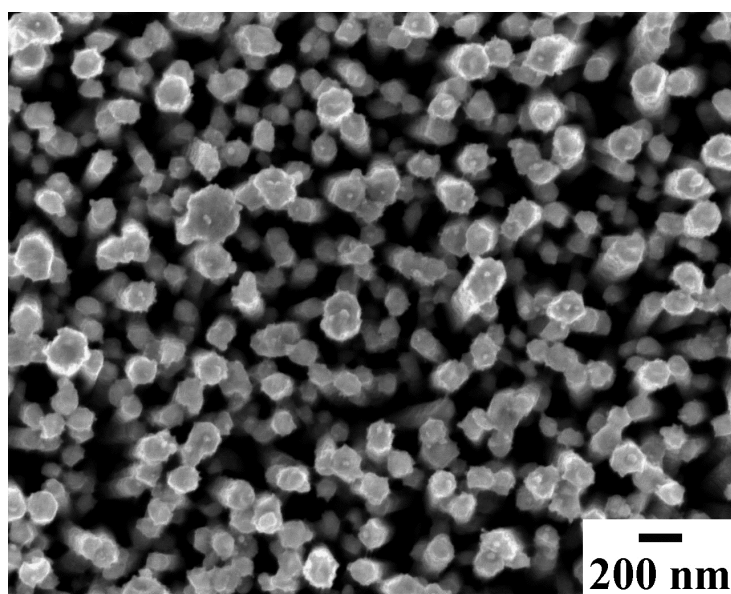

**Figure S5** SEM image of Au/ZnO nanowire arrays reacted in 0.4 mM  $\text{HAuCl}_4$ , 0.1 M  $\text{Na}_3\text{PO}_4$  and 0.15 M PVP aqueous solution.

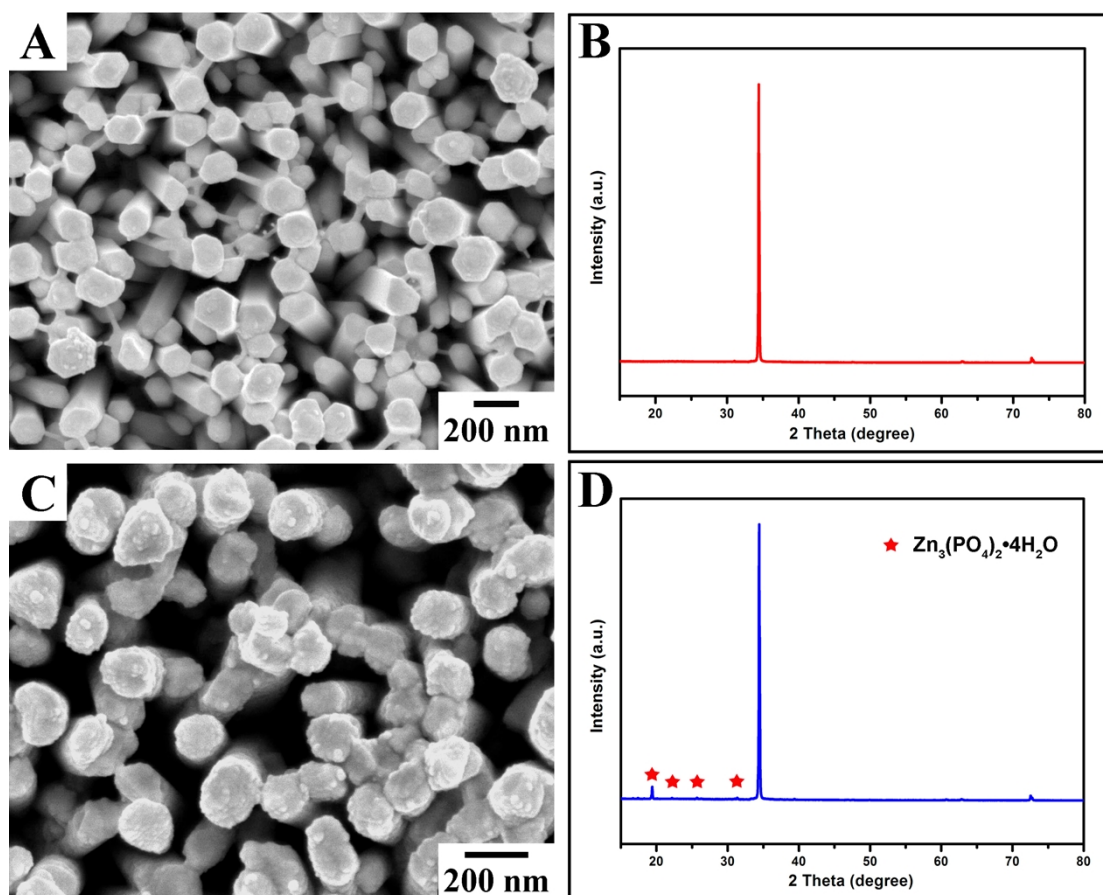

**Figure S6** SEM image and XRD pattern of Au/ZnO nanowire arrays reacted in 0.4 mM HAuCl<sub>4</sub>, 0.3 M PVP, and 0.1 M Na<sub>2</sub>HPO<sub>4</sub> (A, B)/NaH<sub>2</sub>PO<sub>4</sub> (C, D) aqueous solution.

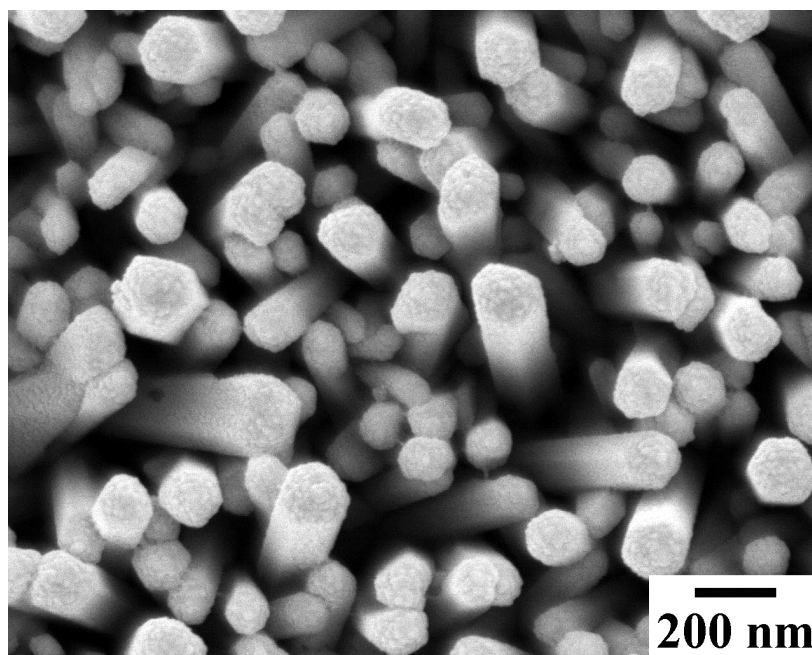

**Figure S7** SEM image of Pt/ZnO nanowire arrays reacted in 0.4 mM  $\text{H}_2\text{PtCl}_6$ , 0.1 M  $\text{Na}_3\text{PO}_4$  and 0.3 M PVP aqueous solution.

### **Results and discussions**

ZnO nanowire arrays could also be connected with other metallic nanowires. As shown in Fig. S7, when  $\text{HAuCl}_4$  was replaced by  $\text{H}_2\text{PtCl}_6$  in the same reaction system, a few number of ultra-fine Pt nanowires could also be formed on the ZnO nanowires, indicating that this strategy may serve as general method for growing metal nanowires.



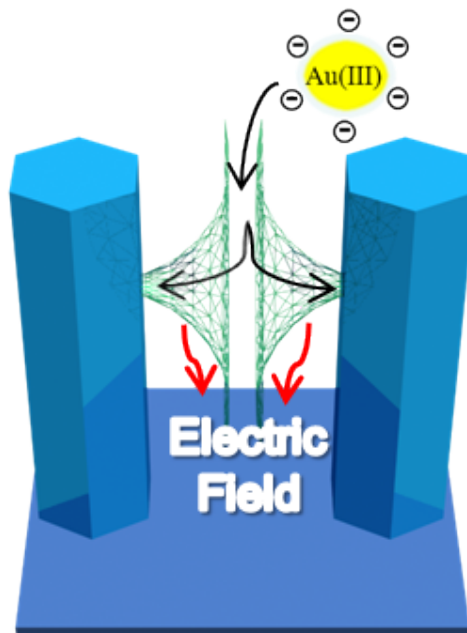

**Figure S8** The formed electric field between two ZnO nanowires.

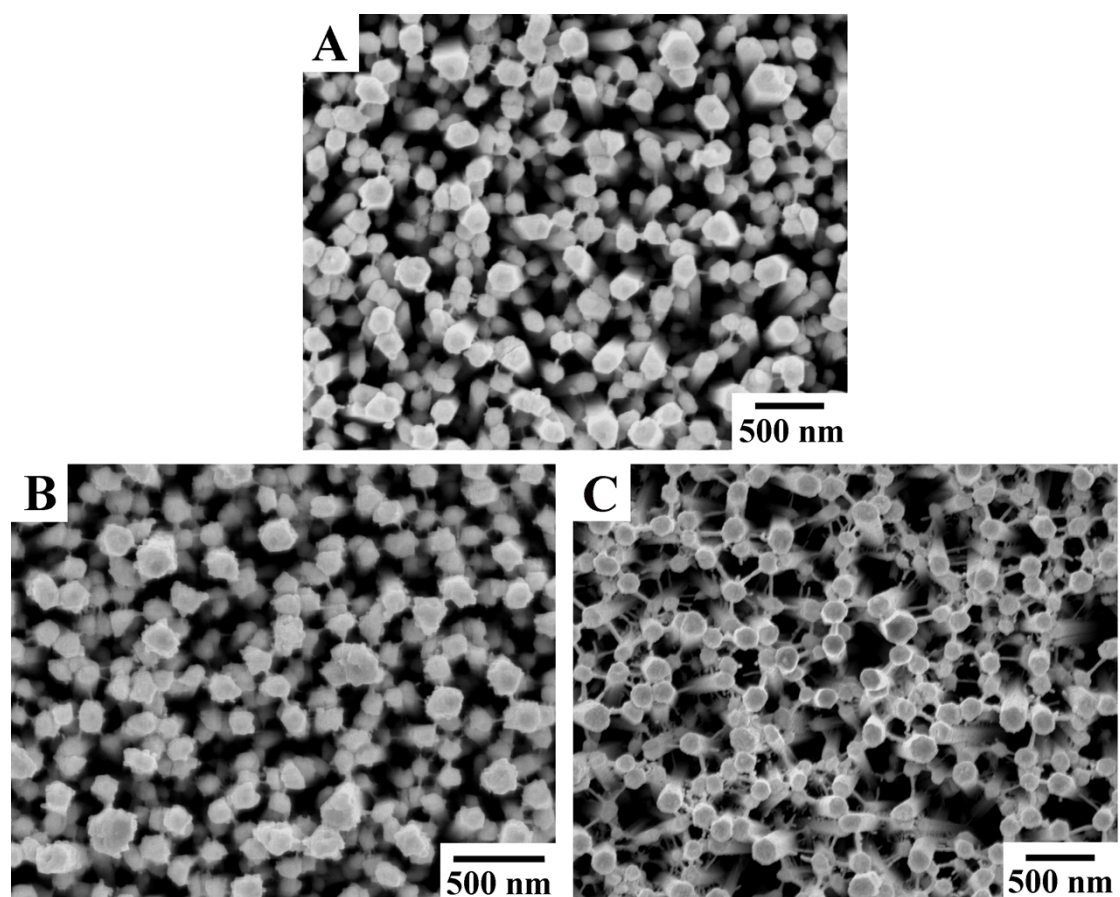

**Figure S9** SEM images of cross-linked Au/ZnO nanowire arrays with different Au deposition (0.4 mM (A), 0.8 mM (B), 1.2 mM (C)  $\text{HAuCl}_4$  was used in the reaction, respectively).

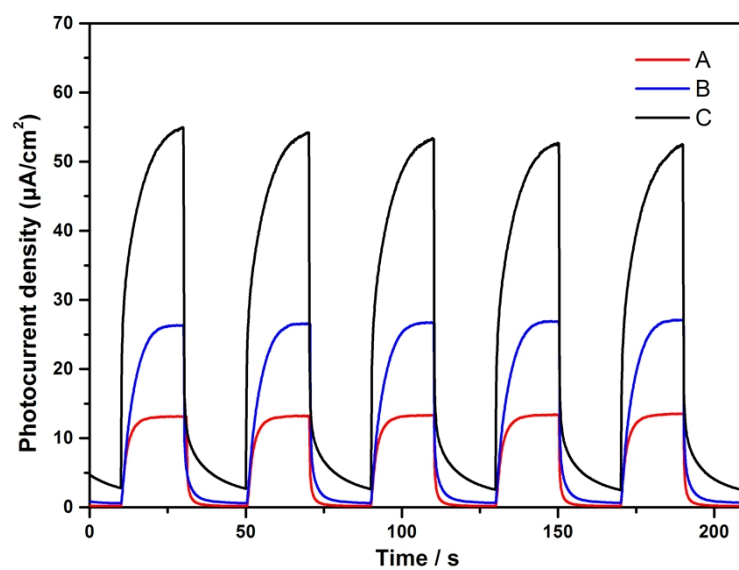

**Figure S10** Amperometric I-t curves of the cross-linked Au/ZnO nanowire arrays with different Au deposition (0.4 mM (A), 0.8 mM (B), 1.2 mM (C)  $\text{HAuCl}_4$  was used in the reaction, respectively) at an applied voltage of +0.2V with 20 s light on/off cycles under visible light irradiation.

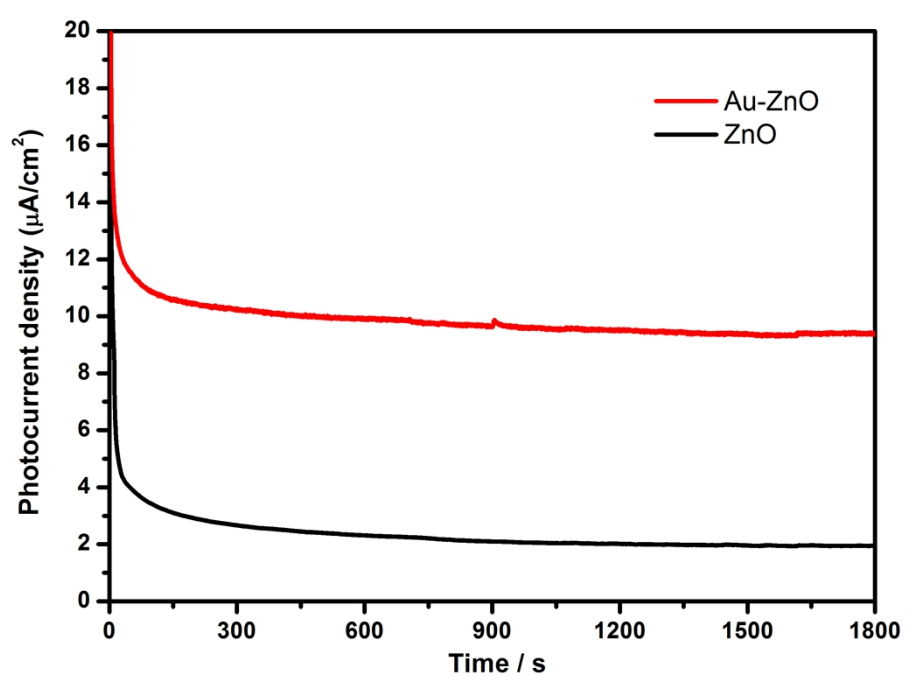

**Figure S11** Working lifetime of Au/ZnO nanowire arrays and bare ZnO nanowire arrays under continuous visible light illumination.

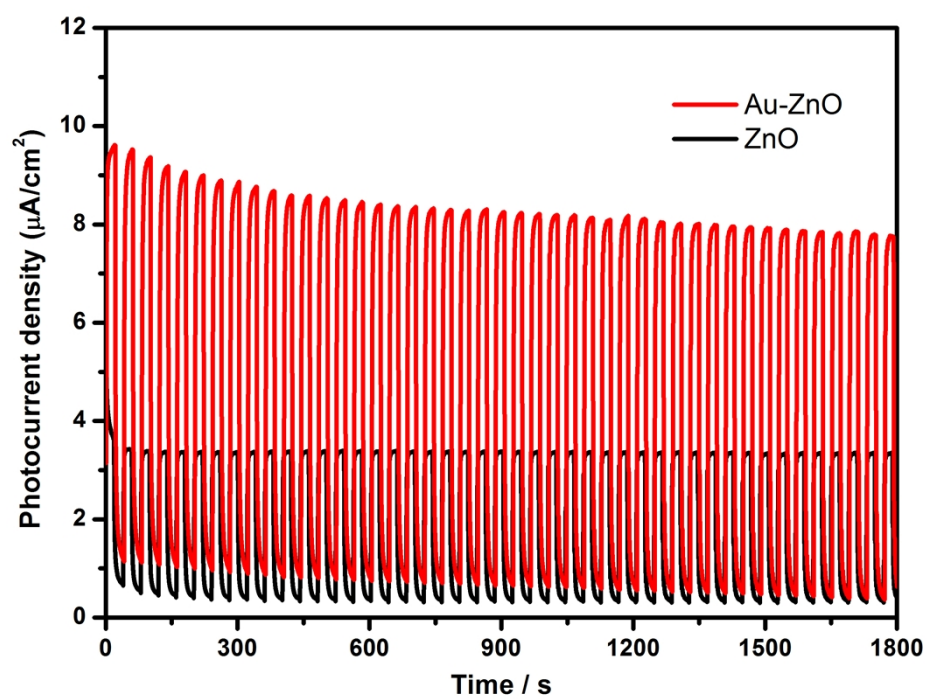

**Figure S12** Working lifetime of Au/ZnO nanowire arrays and bare ZnO nanowire arrays under chopped visible light illumination.
